# Supplementary material for: Sepsis-Associated Acute Kidney Disease
Source: PubMed Central journal article supplement — Kidney Int Rep. 2020 Mar 12;5(6):839–50. doi: 10.1016/j.ekir.2020.03.005 (PMC7270721; doi:10.1016/j.ekir.2020.03.005), 2020-03-12
Supplement: mmc1.pdf [file mmc1.pdf]

## SUPPLEMENTARY APPENDIX

**Table S1.** Site of Infection and Risk of Developing AKD

| <b>Site of Infection</b> | <b>Odds Ratio for Developing AKD</b> | <b>95% CI</b> | <b>P value</b> |
|--------------------------|--------------------------------------|---------------|----------------|
| Pneumonia                | 0.66                                 | 0.43-1.02     | 0.063          |
| Urosepsis                | 1.60                                 | 1.04-2.44     | 0.031          |
| Intra-abdominal          | 0.83                                 | 0.46-1.49     | 0.527          |
| Skin and soft-tissue     | 1.04                                 | 0.49-2.21     | 0.925          |
| Catheter-related         | 1.33                                 | 0.37-4.76     | 0.739          |
| Central nervous system   | 1.99                                 | 0.28-14.24    | 0.605          |
| Endocarditis             | 1.99                                 | 0.28-14.24    | 0.605          |
| Unknown                  | 0.81                                 | 0.46-1.44     | 0.475          |

**Table S2.** TIMP-2\*IGFBP7 Level Changes Between Two Time Points and Predictive Value for AKD at 7 days

| Time Period   | Level Change, median (interquartile range) |                              | <i>P</i> Value | AUC-ROC for Predicting AKD | 95% CI    | <i>P</i> Value |
|---------------|--------------------------------------------|------------------------------|----------------|----------------------------|-----------|----------------|
|               | AKD                                        | Early Reversal               |                |                            |           |                |
| 0 to 6 hours  | 0.12 (-0.67-2.10)<br>N = 94                | 0.30 (-0.10-1.64)<br>N = 226 | 0.24           | 0.54                       | 0.47-0.62 | 0.28           |
| 6 to 24 hours | 0.25 (-0.08-1.13)<br>N = 110               | 0.07 (-0.14-0.70)<br>N = 240 | 0.07           | 0.56                       | 0.50-0.63 | 0.07           |
| 0 to 24 hours | 0.23 (-0.49-2.38)<br>N = 96                | 0.36 (-0.03-2.30)<br>N = 215 | 0.16           | 0.55                       | 0.48-0.62 | 0.19           |

AKD, acute kidney disease; AUC-ROC, area under the receiver operating characteristic curve; CI, confidence interval.

The level change was calculated by subtracting the later value from the early one.

**Table S3.** Clinical Models with Urinary Biomarkers for Predicting AKD

| Variable                                                           | Clinical Model with Biomarker(s) at 6 h |                   |                                                                                            |
|--------------------------------------------------------------------|-----------------------------------------|-------------------|--------------------------------------------------------------------------------------------|
|                                                                    | Odds Ratio (95% CI)                     |                   |                                                                                            |
|                                                                    | TIMP-2*IGFBP7<br>(N = 386)              | NGAL<br>(N = 125) | TIMP-2*IGFBP7 and NGAL<br>(N = 124)                                                        |
| Age, by 5 years                                                    | 1.00 (1.00-1.01)                        | 1.00 (1.00-1.01)  | 1.00 (1.00-1.01)                                                                           |
| Male                                                               | 2.53 (1.33-4.82)                        | 3.06 (1.16-8.05)  | 3.09 (1.24-7.69)                                                                           |
| Race                                                               |                                         |                   |                                                                                            |
| • African American vs White                                        | 1.93 (0.99-3.75)                        | 1.41 (0.56-3.52)  | 1.33 (0.57-3.13)                                                                           |
| • Others vs White                                                  | 1.01 (0.32-3.19)                        | -                 | -                                                                                          |
| Hypertension                                                       | 0.76 (0.50-1.14)                        | 1.79 (0.61-5.37)  | 1.72 (0.52-5.64)                                                                           |
| Cardiac disease                                                    | 1.06 (0.44-2.53)                        | 0.22 (0.03-1.77)  | 0.20 (0.04-0.98)                                                                           |
| APS-III score, <sup>‡</sup> by units of 10                         | 1.17 (1.04-1.31)                        | 1.04 (0.78-1.39)  | 1.05 (0.84-1.31)                                                                           |
| Weight-adjusted urine output, <sup>†‡</sup> by 100 mL              | 0.99 (0.98-1.01)                        | 0.99 (0.97-1.02)  | 0.99 (0.96-1.02)                                                                           |
| Vasopressor*                                                       | 1.25 (0.64-2.43)                        | 0.79 (0.19-3.33)  | 0.81 (0.20-3.39)                                                                           |
| Mechanical ventilation*                                            | 0.45 (0.21-0.93)                        | 0.71 (0.11-4.56)  | 0.73 (0.15-3.65)                                                                           |
| Biomarker(s) at 6 h                                                | 1.27 (1.07-1.49)                        | 1.04 (1.01-1.08)  | 0.90 (0.60-1.36) for TIMP-2*IGFBP7; <sup>§</sup><br>1.05 (1.01-1.09) for NGAL <sup>‡</sup> |
| AUC-ROC (95% CI)                                                   | 0.72 (0.66-0.77)                        | 0.74 (0.65-0.83)  | 0.74 (0.65-0.83)                                                                           |
| Goodness-of-Fit <i>P</i> value                                     | 0.76                                    | 0.57              | 0.25                                                                                       |
| <i>P</i> value for comparison of AUC-ROC with clinical model alone | 0.18                                    | 0.02              | 0.02                                                                                       |

AUC-ROC, area under the receiver operating characteristic curve; CI, confidence interval; IGFBP7, insulin-like growth factor-binding protein 7; NGAL, neutrophil gelatinase-associated lipocalin; TIMP-2, tissue inhibitor of metalloproteinases-2.

<sup>‡</sup>Square root transformation was used for selected variables in the model.

<sup>§</sup>Log transformation was used for selected variable in the model.

**Table S4.** Validation of Clinical Model for Predicting Non-Recovery AKI at Hospital Discharge

| Variable                                   | OR   | 95% CI    | P value |
|--------------------------------------------|------|-----------|---------|
| Age, by 5 years                            | 1.00 | 1.00-1.00 | 0.45    |
| Male                                       | 1.69 | 1.19-2.40 | 0.003   |
| Race                                       |      |           |         |
| • African American vs White                | 1.45 | 0.97-2.14 | 0.07    |
| • Others vs White                          | 1.86 | 0.87-4.02 | 0.11    |
| Hypertension                               | 0.69 | 0.48-1.01 | 0.05    |
| Cardiac disease                            | 0.85 | 0.49-1.47 | 0.56    |
| APS-III score, ‡ by units of 10            | 1.11 | 1.04-1.19 | 0.002   |
| Weight-adjusted urine output, †‡ by 100 mL | 0.98 | 0.97-0.99 | <0.001  |
| Vasopressor*                               | 1.13 | 0.71-1.79 | 0.60    |
| Mechanical ventilation*                    | 1.05 | 0.66-1.69 | 0.83    |

APS-III, Acute Physiology and Chronic Health Evaluation III; CI, confidence interval; OR, odds ratio.

N = 584; area under the receiver operating characteristic curve = 0.68 (95% CI, 0.64-0.73); Goodness-of-Fit *P* value = 0.45.

\*Captured in 6 hours after ICU admission.

†The available urine volume in the 24 hours after ICU admission was summed and divided by the weight.

‡Square root transformation was used for selected variables in the model.

**Table S5.** Urinary Biomarkers for Predicting Non-Recovery AKI at Hospital Discharge

| Urinary Biomarker | Time Measured (hours) | N   | AUC-ROC for Prediction of Non-Recovery AKI | 95% CI    | P value |
|-------------------|-----------------------|-----|--------------------------------------------|-----------|---------|
| TIMP-2*IGFBP7     | 0                     | 425 | 0.54                                       | 0.48-0.59 | 0.19    |
|                   | 6                     | 468 | 0.62                                       | 0.56-0.66 | <0.001  |
|                   | 24                    | 455 | 0.62                                       | 0.56-0.67 | <0.001  |
| NGAL              | 0                     | 65  | 0.52                                       | 0.38-0.67 | 0.75    |
|                   | 6                     | 150 | 0.59                                       | 0.50-0.69 | 0.046   |
|                   | 24                    | 150 | 0.57                                       | 0.48-0.66 | 0.13    |
| KIM-1             | 0                     | 206 | 0.56                                       | 0.48-0.64 | 0.16    |
|                   | 6                     | 223 | 0.55                                       | 0.48-0.63 | 0.17    |
|                   | 24                    | 214 | 0.53                                       | 0.45-0.60 | 0.52    |
| L-FABP            | 0                     | 104 | 0.53                                       | 0.42-0.65 | 0.55    |
|                   | 6                     | 106 | 0.57                                       | 0.46-0.68 | 0.23    |
|                   | 24                    | 105 | 0.55                                       | 0.44-0.67 | 0.36    |
| Type IV collagen  | 0                     | 193 | 0.56                                       | 0.48-0.65 | 0.13    |
|                   | 6                     | 210 | 0.60                                       | 0.52-0.68 | 0.01    |
|                   | 24                    | 201 | 0.55                                       | 0.47-0.63 | 0.25    |

AKI, acute kidney injury; AUC-ROC, area under the receiver operating characteristic curve; CI, confidence interval; IGFBP7, insulin-like growth factor-binding protein 7; KIM-1, kidney injury molecule-1; L-FABP, liver-type fatty acid binding protein; NGAL, neutrophil gelatinase-associated lipocalin; TIMP-2, tissue inhibitor of metalloproteinases-2.

**Table S6.** Clinical Model with Urinary Biomarkers for Predicting Non-Recovery AKI at Hospital Discharge

| Variable                                                           | Clinical Model with Biomarker(s)              |                                                |                                      |                                                  |                                                                              |                                                                                             |
|--------------------------------------------------------------------|-----------------------------------------------|------------------------------------------------|--------------------------------------|--------------------------------------------------|------------------------------------------------------------------------------|---------------------------------------------------------------------------------------------|
|                                                                    | Odds Ratio (95% CI)                           |                                                |                                      |                                                  |                                                                              |                                                                                             |
|                                                                    | TIMP-2*IGFBP7 (6 h) <sup>§</sup><br>(N = 465) | TIMP-2*IGFBP7 (24 h) <sup>§</sup><br>(N = 454) | NGAL (6 h) <sup>‡</sup><br>(N = 150) | Type IV Collagen (6 h) <sup>§</sup><br>(N = 208) | TIMP-2*IGFBP7 (6 h) <sup>§</sup><br>and NGAL (6 h) <sup>‡</sup><br>(N = 149) | TIMP-2*IGFBP7 (6 h) <sup>§</sup><br>and Type IV Collagen<br>(6 h) <sup>§</sup><br>(N = 199) |
| Age, by 5 years                                                    | 1.00 (1.00-1.00)                              | 1.00 (1.00-1.00)                               | 1.00 (1.00-1.01)                     | 1.00 (1.00-1.01)                                 | 1.00 (1.00-1.01)                                                             | 1.00 (1.00-1.01)                                                                            |
| Male                                                               | 1.81 (1.22-2.71)                              | 1.69 (1.13-2.52)                               | 1.69 (0.83-3.44)                     | 2.37 (1.22-4.63)                                 | 1.72 (0.83-3.55)                                                             | 2.40 (1.17-4.88)                                                                            |
| Race                                                               |                                               |                                                |                                      |                                                  |                                                                              |                                                                                             |
| • African American vs White                                        | 1.42 (0.92-2.22)                              | 1.52 (0.98-2.34)                               | 0.96 (0.46-2.00)                     | 1.14 (0.57-2.28)                                 | 0.92 (0.44-1.93)                                                             | 1.02 (0.49-2.09)                                                                            |
| • Others vs White                                                  | 1.55 (0.68-3.56)                              | 1.63 (0.68-3.89)                               | 0.44 (0.04-5.12)                     | 0.80 (0.26-2.45)                                 | 0.41 (0.04-4.77)                                                             | 0.72 (0.23-2.26)                                                                            |
| Hypertension                                                       | 0.89 (0.58-1.35)                              | 0.77 (0.51-1.18)                               | 1.15 (0.52-2.53)                     | 1.62 (0.83-3.17)                                 | 1.08 (0.49-2.40)                                                             | 1.71 (0.85-3.41)                                                                            |
| Cardiac disease                                                    | 1.04 (0.57-1.92)                              | 1.06 (0.58-1.94)                               | 0.38 (0.12-1.26)                     | 0.60 (0.20-1.76)                                 | 0.35 (0.10-1.20)                                                             | 0.47 (0.15-1.49)                                                                            |
| APS-III score, <sup>‡</sup> by units of 10                         | 1.08 (1.00-1.12)                              | 1.09 (1.00-1.18)                               | 0.97 (0.83-1.14)                     | 1.15 (1.00-1.32)                                 | 0.98 (0.84-1.16)                                                             | 1.16 (1.00-1.34)                                                                            |
| Weight-adjusted urine output, <sup>††</sup> by 100 mL              | 0.99 (0.98-1.00)                              | 0.99 (0.98-1.00)                               | 1.00 (0.98-1.02)                     | 0.99 (0.98-1.01)                                 | 1.00 (0.98-1.02)                                                             | 0.99 (0.97-1.01)                                                                            |
| Vasopressor*                                                       | 1.09 (0.66-1.80)                              | 1.29 (0.76-2.18)                               | 0.65 (0.26-1.65)                     | 1.53 (0.69-3.38)                                 | 0.68 (0.27-1.73)                                                             | 1.66 (0.72-3.79)                                                                            |
| Mechanical ventilation*                                            | 1.33 (0.77-2.29)                              | 0.96 (0.55-1.67)                               | 2.30 (0.76-6.86)                     | 1.09 (0.46-2.59)                                 | 2.31 (0.77-6.95)                                                             | 1.05 (0.43-2.55)                                                                            |
| Biomarker(s) at 6 h                                                | 1.16 (1.00-1.33)                              | 1.23 (1.04-1.45)                               | 1.02 (1.00-1.05)                     | 1.27 (0.99-1.64)                                 | 0.91 (0.67-1.22) for<br>TIMP-2*IGFBP7;<br>1.02 (1.00-1.06) for<br>NGAL       | 1.06 (0.80-1.40) for<br>TIMP-2*IGFBP7;<br>1.30 (0.96-1.75) for<br>type IV collagen          |
| AUC-ROC (95% CI)                                                   | 0.68 (0.63-0.73)                              | 0.67 (0.62-0.72)                               | 0.66 (0.57-0.75)                     | 0.71 (0.64-0.78)                                 | 0.66 (0.57-0.75)                                                             | 0.72 (0.65-0.79)                                                                            |
| Goodness-of-Fit <i>P</i> value                                     | 0.67                                          | 0.21                                           | 0.23                                 | 0.57                                             | 0.76                                                                         | 0.47                                                                                        |
| <i>P</i> value for comparison of AUC-ROC with clinical model alone | 0.14                                          | 0.25                                           | 0.07                                 | 0.09                                             | 0.09                                                                         | 0.07                                                                                        |

AUC-ROC, area under the receiver operating characteristic curve; CI, confidence interval; IGFBP7, insulin-like growth factor-binding protein 7; NGAL, neutrophil gelatinase-associated lipocalin; TIMP-2, tissue inhibitor of metalloproteinases-2.

<sup>‡</sup>Square root transformation was used for selected variables and biomarker in the model.

<sup>§</sup>Log transformation was used for selected biomarker(s) in the model.

## Modified STROBE Statement—checklist of items that should be included in reports of observational studies (Cohort/Cross-sectional and case-control studies)

|                              | Item No | Recommendation                                                                                                                                                                                                                                                                                                                                                                                                                                                         | Page No     |
|------------------------------|---------|------------------------------------------------------------------------------------------------------------------------------------------------------------------------------------------------------------------------------------------------------------------------------------------------------------------------------------------------------------------------------------------------------------------------------------------------------------------------|-------------|
| Title and abstract           | 1       | (a) Indicate the study’s design with a commonly used term in the title or the abstract                                                                                                                                                                                                                                                                                                                                                                                 | 1, 3        |
|                              |         | (b) Provide in the abstract an informative and balanced summary of what was done and what was found                                                                                                                                                                                                                                                                                                                                                                    | 1, 3        |
| <b>Introduction</b>          |         |                                                                                                                                                                                                                                                                                                                                                                                                                                                                        |             |
| Background/rationale         | 2       | Explain the scientific background and rationale for the investigation being reported                                                                                                                                                                                                                                                                                                                                                                                   | 4           |
| Objectives                   | 3       | State specific objectives, including any prespecified hypotheses                                                                                                                                                                                                                                                                                                                                                                                                       | 5           |
| <b>Methods</b>               |         |                                                                                                                                                                                                                                                                                                                                                                                                                                                                        |             |
| Study design                 | 4       | Present key elements of study design early in the paper                                                                                                                                                                                                                                                                                                                                                                                                                | 12          |
| Setting                      | 5       | Describe the setting, locations, and relevant dates, including periods of recruitment, exposure, follow-up, and data collection                                                                                                                                                                                                                                                                                                                                        | 13          |
| Participants                 | 6       | (a) <i>Cohort study</i> —Give the eligibility criteria, and the sources and methods of selection of participants. Describe methods of follow-up<br><i>Case-control study</i> —Give the eligibility criteria, and the sources and methods of case ascertainment and control selection. Give the rationale for the choice of cases and controls<br><i>Cross-sectional study</i> —Give the eligibility criteria, and the sources and methods of selection of participants | 12          |
| Variables                    | 7       | Clearly define all outcomes, exposures, predictors, potential confounders, and effect modifiers. Give diagnostic criteria, if applicable                                                                                                                                                                                                                                                                                                                               | 13          |
| Data sources/<br>measurement | 8*      | For each variable of interest, give sources of data and details of methods of assessment (measurement).                                                                                                                                                                                                                                                                                                                                                                | 13-14       |
| Bias                         | 9       | Describe any efforts to address potential sources of bias                                                                                                                                                                                                                                                                                                                                                                                                              | 11          |
| Study size                   | 10      | Explain how the study size was arrived at (if applicable)                                                                                                                                                                                                                                                                                                                                                                                                              | 5, Figure 1 |
| Quantitative variables       | 11      | Explain how quantitative variables were handled in the analyses. If applicable, describe which groupings were chosen and why                                                                                                                                                                                                                                                                                                                                           | 14-15       |
| Statistical methods          | 12      | (a) Describe all statistical methods, including those used to control for confounding                                                                                                                                                                                                                                                                                                                                                                                  | 14-15       |
|                              |         | (b) Describe any methods used to examine subgroups and interactions                                                                                                                                                                                                                                                                                                                                                                                                    | 14-15       |
|                              |         | (c) Explain how missing data were addressed                                                                                                                                                                                                                                                                                                                                                                                                                            | 14          |
|                              |         | (d) <i>Cohort study</i> —If applicable, explain how loss to follow-up was addressed<br><i>Case-control study</i> —If applicable, explain how matching of cases and controls was addressed<br><i>Cross-sectional study</i> —If applicable, describe analytical methods taking account of sampling strategy                                                                                                                                                              | -           |
|                              |         | (e) Describe any sensitivity analyses                                                                                                                                                                                                                                                                                                                                                                                                                                  | 8-9         |
| <b>Results</b>               |         |                                                                                                                                                                                                                                                                                                                                                                                                                                                                        |             |
| Participants                 | 13*     | (a) Report numbers of individuals at each stage of study—eg numbers potentially eligible, examined for eligibility,                                                                                                                                                                                                                                                                                                                                                    | 5           |

|                   |     |                                                                                                                                                                                                              |              |
|-------------------|-----|--------------------------------------------------------------------------------------------------------------------------------------------------------------------------------------------------------------|--------------|
|                   |     | confirmed eligible, included in the study, completing follow-up, and analyzed                                                                                                                                |              |
|                   |     | <b>(c) Use of a flow diagram</b>                                                                                                                                                                             | Figure 1     |
| Descriptive data  | 14* | (a) Give characteristics of study participants (eg demographic, clinical, social) and information on exposures and potential confounders                                                                     | 5-6, Table 1 |
|                   |     | (b) Indicate number of participants with missing data for each variable of interest                                                                                                                          | Table 3      |
|                   |     | (c) <i>Cohort study</i> —Summarise follow-up time (eg, average and total amount)                                                                                                                             | 6-8          |
| Outcome data      | 15* | <i>Cohort study</i> —Report numbers of outcome events or summary measures over time                                                                                                                          | 6-8          |
|                   |     | <i>Case-control study</i> —Report numbers in each exposure category, or summary measures of exposure                                                                                                         |              |
|                   |     | <i>Cross-sectional study</i> —Report numbers of outcome events or summary measures                                                                                                                           |              |
| Main results      | 16  | (a) Give unadjusted estimates and, if applicable, confounder-adjusted estimates and their precision (eg, 95% confidence interval). Make clear which confounders were adjusted for and why they were included | 5-8          |
| Other analyses    | 17  | Report other analyses done—eg analyses of subgroups and interactions, and sensitivity analyses                                                                                                               | 8-9          |
| <b>Discussion</b> |     |                                                                                                                                                                                                              |              |
| Key results       | 18  | Summarise key results with reference to study objectives                                                                                                                                                     | 9            |
| Limitations       | 19  | Discuss limitations of the study, taking into account sources of potential bias or imprecision. Discuss both direction and magnitude of any potential bias                                                   | 11           |
| Interpretation    | 20  | Give a cautious overall interpretation of results considering objectives, limitations, multiplicity of analyses, results from similar studies, and other relevant evidence                                   | 11           |
| Generalisability  | 21  | Discuss the generalisability (external validity) of the study results                                                                                                                                        | 11           |

\*Give information separately for cases and controls in case-control studies and, if applicable, for exposed and unexposed groups in cohort and cross-sectional studies.

**Note:** An Explanation and Elaboration article discusses each checklist item and gives methodological background and published examples of transparent reporting. The STROBE checklist is best used in conjunction with this article (freely available on the Web sites of PLoS Medicine at <http://www.plosmedicine.org/>, Annals of Internal Medicine at <http://www.annals.org/>, and Epidemiology at <http://www.epidem.com/>). Information on the STROBE Initiative is available at [www.strobe-statement.org](http://www.strobe-statement.org).
